# Supplementary material for: Ocrelizumab in Patients with Active Primary Progressive Multiple Sclerosis: Clinical Outcomes and Immune Markers of Treatment Response
Source: MDPI journal article supplement (doi:10.3390/cells11121959), 2022-06-17
Supplement: s1 [file s1]

**Table S1.** MRI Volumetry and Lesion analysis parameters at baseline, at 12 and at 24 months for all patients and for responders at 24 months vs. non-responders at 24 months

| Parameter      | All patients (N=20) |       | Non-responders (N=8) |       | Responders (N=12) |       | p*    | Effect of time (all patients) |       | Effect of time (Responders vs. Non-responders) |       |
|----------------|---------------------|-------|----------------------|-------|-------------------|-------|-------|-------------------------------|-------|------------------------------------------------|-------|
|                | Mean                | SE    | Mean                 | SE    | Mean              | SE    |       | F                             | p     | F                                              | p     |
| WM cm3 BL      | 456,83              | 19,18 | 487,18               | 31,93 | 436,59            | 23,10 | 0,208 | 1,82                          | 0,181 | 1,809                                          | 0,198 |
| WM cm3 12mo    | 437,80              | 15,90 | 463,32               | 27,62 | 420,80            | 18,40 | 0,157 |                               |       |                                                |       |
| WM cm3 24mo    | 467,82              | 30,23 | 523,54               | 67,39 | 430,67            | 19,74 | 0,181 |                               |       |                                                |       |
| WM % BL        | 32,56               | 1,16  | 34,09                | 1,85  | 31,55             | 1,48  | 0,208 | 1,811                         | 0,182 | 1,775                                          | 0,189 |
| WM % 12mo      | 31,29               | 0,83  | 32,68                | 1,53  | 30,36             | 0,90  | 0,27  |                               |       |                                                |       |
| WM % 24mo      | 33,37               | 1,82  | 36,51                | 4,14  | 31,27             | 1,11  | 0,343 |                               |       |                                                |       |
| GM cm3 BL      | 711,31              | 31,01 | 701,69               | 50,65 | 717,72            | 40,88 | 0,571 | 1,529                         | 0,234 | 1,419                                          | 0,26  |
| GM cm3 12mo    | 734,00              | 22,10 | 719,28               | 44,59 | 743,82            | 23,24 | 0,343 |                               |       |                                                |       |
| GM cm3 24mo    | 708,96              | 21,27 | 683,29               | 38,31 | 726,08            | 24,76 | 0,571 |                               |       |                                                |       |
| GM % BL        | 50,76               | 1,93  | 49,29                | 3,48  | 51,74             | 2,32  | 0,343 | 0,935                         | 0,404 | 0,864                                          | 0,433 |
| GM % 12mo      | 52,80               | 1,62  | 50,97                | 3,11  | 54,02             | 1,77  | 0,27  |                               |       |                                                |       |
| GM % 24mo      | 51,00               | 1,52  | 48,27                | 3,07  | 52,83             | 1,38  | 0,305 |                               |       |                                                |       |
| CSF cm3 BL     | 233,29              | 21,22 | 236,54               | 35,72 | 231,13            | 27,46 | 0,91  | 3,086                         | 0,062 | 2,888                                          | 0,074 |
| CSF cm3 12mo   | 224,00              | 24,52 | 230,72               | 39,43 | 219,52            | 32,67 | 0,91  |                               |       |                                                |       |
| CSF cm3 24mo   | 219,34              | 22,79 | 216,24               | 39,07 | 221,40            | 29,10 | 0,851 |                               |       |                                                |       |
| CSF % BL       | 16,67               | 1,50  | 16,62                | 2,47  | 16,71             | 1,98  | 0,678 | 2,616                         | 0,091 | 2,46                                           | 0,105 |
| CSF % 12mo     | 15,91               | 1,65  | 16,35                | 2,75  | 15,62             | 2,15  | 0,851 |                               |       |                                                |       |
| CSF % 24mo     | 15,63               | 1,55  | 15,22                | 2,73  | 15,91             | 1,93  | 0,734 |                               |       |                                                |       |
| Brain cm3 BL   | 1170,09             | 32,55 | 1188,87              | 44,11 | 1157,57           | 46,79 | 0,792 | 2,986                         | 0,067 | 2,829                                          | 0,077 |
| Brain cm3 12mo | 1171,81             | 28,10 | 1182,60              | 47,46 | 1164,61           | 36,13 | 0,734 |                               |       |                                                |       |
| Brain cm3 24mo | 1176,79             | 29,81 | 1206,83              | 47,26 | 1156,76           | 38,99 | 0,624 |                               |       |                                                |       |
| Brain % BL     | 83,33               | 1,50  | 83,38                | 2,47  | 83,29             | 1,98  | 0,678 | 2,616                         | 0,091 | 2,46                                           | 0,105 |
| Brain % 12mo   | 84,09               | 1,65  | 83,65                | 2,75  | 84,38             | 2,15  | 0,851 |                               |       |                                                |       |
| Brain % 24mo   | 84,37               | 1,55  | 84,78                | 2,73  | 84,09             | 1,93  | 0,734 |                               |       |                                                |       |
| IC cm3 BL      | 1401,42             | 28,33 | 1425,41              | 28,79 | 1385,44           | 43,59 | 0,521 | 1,095                         | 0,348 | 1,044                                          | 0,366 |

|                       |         |       |         |       |         |       |       |       |       |       |       |
|-----------------------|---------|-------|---------|-------|---------|-------|-------|-------|-------|-------|-------|
| IC cm3 12mo           | 1395,81 | 25,55 | 1413,32 | 29,36 | 1384,13 | 38,51 | 0,734 |       |       |       |       |
| IC cm3 24mo           | 1396,12 | 27,01 | 1423,07 | 26,72 | 1378,16 | 41,52 | 0,521 |       |       |       |       |
| Cerebrum cm3 BL       | 1012,77 | 28,43 | 1028,59 | 36,02 | 1002,22 | 41,85 | 0,734 |       |       |       |       |
| Cerebrum cm3 12mo     | 1018,09 | 24,66 | 1025,88 | 40,02 | 1012,90 | 32,63 | 0,734 | 3,01  | 0,065 | 2,885 | 0,074 |
| Cerebrum cm3 24mo     | 1026,03 | 28,70 | 1057,67 | 49,62 | 1004,94 | 35,01 | 0,624 |       |       |       |       |
| Cerebrum % BL         | 72,25   | 1,34  | 72,15   | 2,02  | 72,32   | 1,85  | 0,851 |       |       |       |       |
| Cerebrum % 12mo       | 73,07   | 1,49  | 72,58   | 2,34  | 73,40   | 2,01  | 0,792 | 2,737 | 0,082 | 2,602 | 0,093 |
| Cerebrum % 24mo       | 73,55   | 1,55  | 74,27   | 2,90  | 73,06   | 1,80  | 0,91  |       |       |       |       |
| Cerebrum GM cm3 BL    | 605,58  | 27,04 | 594,30  | 42,55 | 613,10  | 36,38 | 0,521 |       |       |       |       |
| Cerebrum GM cm3 12mo  | 625,57  | 19,59 | 612,84  | 38,12 | 634,05  | 21,73 | 0,343 | 1,933 | 0,163 | 1,792 | 0,187 |
| Cerebrum GM cm3 24mo  | 608,08  | 17,44 | 589,93  | 27,98 | 620,18  | 22,59 | 0,624 |       |       |       |       |
| Cerebrum GM % BL      | 43,21   | 1,69  | 41,75   | 2,93  | 44,18   | 2,08  | 0,27  |       |       |       |       |
| Cerebrum GM % 12mo    | 45,00   | 1,43  | 43,43   | 2,66  | 46,04   | 1,63  | 0,27  | 1,302 | 0,288 | 1,201 | 0,317 |
| Cerebrum GM % 24mo    | 43,72   | 1,22  | 41,65   | 2,32  | 45,11   | 1,26  | 0,384 |       |       |       |       |
| Cerebrum WM cm3 BL    | 407,19  | 16,35 | 434,29  | 26,96 | 389,12  | 19,68 | 0,27  |       |       |       |       |
| Cerebrum WM cm3 12mo  | 392,53  | 13,31 | 413,04  | 23,32 | 378,85  | 15,39 | 0,181 | 1,772 | 0,188 | 1,782 | 0,203 |
| Cerebrum WM cm3 24mo  | 417,95  | 27,25 | 467,74  | 61,86 | 384,76  | 16,23 | 0,27  |       |       |       |       |
| Cerebrum WM % BL      | 29,04   | 0,99  | 30,41   | 1,57  | 28,13   | 1,26  | 0,208 |       |       |       |       |
| Cerebrum WM % 12mo    | 28,07   | 0,69  | 29,14   | 1,28  | 27,36   | 0,76  | 0,427 | 1,763 | 0,19  | 1,749 | 0,194 |
| Cerebrum WM % 24mo    | 29,82   | 1,65  | 32,63   | 3,82  | 27,96   | 0,92  | 0,384 |       |       |       |       |
| Cerebelum cm3 BL      | 132,86  | 4,07  | 136,82  | 7,67  | 130,23  | 4,60  | 0,624 |       |       |       |       |
| Cerebelum cm3 12mo    | 131,76  | 3,68  | 134,83  | 7,48  | 129,72  | 3,78  | 1     | 0,834 | 0,445 | 0,93  | 0,407 |
| Cerebelum cm3 24mo    | 128,96  | 3,84  | 127,53  | 8,00  | 129,91  | 3,88  | 0,97  |       |       |       |       |
| Cerebelum % BL        | 9,50    | 0,20  | 9,60    | 0,46  | 9,44    | 0,16  | 1     |       |       |       |       |
| Cerebelum % 12mo      | 9,44    | 0,21  | 9,53    | 0,45  | 9,39    | 0,19  | 0,792 | 0,381 | 0,687 | 0,46  | 0,637 |
| Cerebelum % 24mo      | 9,26    | 0,24  | 8,98    | 0,56  | 9,44    | 0,17  | 1     |       |       |       |       |
| Cerebelum GM cm3 BL   | 96,87   | 3,91  | 98,94   | 7,76  | 95,49   | 4,25  | 0,792 |       |       |       |       |
| Cerebelum GM cm3 12mo | 99,14   | 3,13  | 97,75   | 6,89  | 100,06  | 2,80  | 0,157 | 1,308 | 0,286 | 1,299 | 0,29  |
| Cerebelum GM cm3 24mo | 91,83   | 4,81  | 85,79   | 11,22 | 95,86   | 3,06  | 0,427 |       |       |       |       |
| Cerebelum GM % BL     | 6,93    | 0,25  | 6,96    | 0,53  | 6,91    | 0,25  | 0,678 |       |       |       |       |
| Cerebelum GM % 12mo   | 7,13    | 0,23  | 6,93    | 0,49  | 7,27    | 0,22  | 0,238 | 1,01  | 0,377 | 1,025 | 0,373 |
| Cerebelum GM % 24mo   | 6,63    | 0,35  | 6,08    | 0,80  | 6,99    | 0,21  | 0,181 |       |       |       |       |
| Cerebelum WM cm3 BL   | 35,99   | 2,96  | 37,88   | 5,87  | 34,73   | 3,20  | 0,97  | 1,238 | 0,305 | 1,144 | 0,334 |

|                               |              |             |              |             |              |             |              |       |       |       |       |
|-------------------------------|--------------|-------------|--------------|-------------|--------------|-------------|--------------|-------|-------|-------|-------|
| Cerebelum WM cm3 12mo         | 32,63        | 2,61        | 37,08        | 5,06        | 29,66        | 2,61        | 0,208        |       |       |       |       |
| Cerebelum WM cm3 24mo         | 37,13        | 3,28        | 41,73        | 6,34        | 34,06        | 3,43        | 0,427        |       |       |       |       |
| Cerebelum WM % BL             | 2,55         | 0,19        | 2,64         | 0,37        | 2,50         | 0,22        | 1            |       |       |       |       |
| Cerebelum WM % 12mo           | 2,31         | 0,16        | 2,60         | 0,32        | 2,12         | 0,15        | 0,238        | 1,14  | 0,334 | 1,052 | 0,363 |
| Cerebelum WM % 24mo           | 2,63         | 0,21        | 2,90         | 0,40        | 2,45         | 0,22        | 0,571        |       |       |       |       |
| Brainstem cm3 BL              | 22,12        | 0,86        | 22,57        | 1,42        | 21,82        | 1,12        | 0,792        |       |       |       |       |
| Brainstem cm3 12mo            | 21,92        | 0,70        | 21,85        | 1,26        | 21,97        | 0,85        | 0,734        | 0,753 | 0,481 | 0,75  | 0,483 |
| Brainstem cm3 24mo            | 21,66        | 0,70        | 21,58        | 0,98        | 21,73        | 1,03        | 1            |       |       |       |       |
| Brainstem % BL                | 1,58         | 0,04        | 1,58         | 0,09        | 1,57         | 0,05        | 0,624        |       |       |       |       |
| Brainstem % 12mo              | 1,57         | 0,04        | 1,55         | 0,08        | 1,59         | 0,04        | 0,238        | 0,333 | 0,719 | 0,312 | 0,735 |
| Brainstem % 24mo              | 1,56         | 0,04        | 1,52         | 0,07        | 1,58         | 0,04        | 0,521        |       |       |       |       |
| LatVentricles cm3 BL          | 15,96        | 1,73        | 13,49        | 1,66        | 17,61        | 2,61        | 0,343        |       |       |       |       |
| <b>LatVentricles cm3 12mo</b> | <b>18,02</b> | <b>2,40</b> | <b>12,88</b> | <b>1,59</b> | <b>21,45</b> | <b>3,58</b> | <b>0,082</b> | 0,104 | 0,901 | 0,114 | 0,79  |
| LatVentricles cm3 24mo        | 17,55        | 2,34        | 13,05        | 0,99        | 20,54        | 3,66        | 0,27         |       |       |       |       |
| LatVentricles % BL            | 1,13         | 0,12        | 0,96         | 0,13        | 1,25         | 0,17        | 0,305        |       |       |       |       |
| <b>LatVentricles % 12mo</b>   | <b>1,28</b>  | <b>0,16</b> | <b>0,92</b>  | <b>0,13</b> | <b>1,52</b>  | <b>0,24</b> | <b>0,039</b> | 0,097 | 0,908 | 0,104 | 0,902 |
| LatVentricles % 24mo          | 1,25         | 0,16        | 0,92         | 0,07        | 1,46         | 0,25        | 0,238        |       |       |       |       |
| Caudate cm3 BL                | 5,53         | 0,31        | 5,59         | 0,46        | 5,49         | 0,43        | 0,851        |       |       |       |       |
| Caudate cm3 12mo              | 5,66         | 0,29        | 5,65         | 0,56        | 5,67         | 0,33        | 0,97         | 3,16  | 0,058 | 3,146 | 0,082 |
| Caudate cm3 24mo              | 5,78         | 0,28        | 6,17         | 0,50        | 5,53         | 0,32        | 0,181        |       |       |       |       |
| Caudate % BL                  | 0,40         | 0,03        | 0,40         | 0,04        | 0,40         | 0,04        | 0,678        |       |       |       |       |
| Caudate % 12mo                | 0,41         | 0,02        | 0,40         | 0,04        | 0,42         | 0,03        | 0,97         | 3,273 | 0,072 | 3,228 | 0,056 |
| Caudate % 24mo                | 0,42         | 0,02        | 0,43         | 0,04        | 0,41         | 0,03        | 0,27         |       |       |       |       |
| Putamen cm3 BL                | 6,99         | 0,32        | 7,45         | 0,54        | 6,69         | 0,38        | 0,427        |       |       |       |       |
| Putamen cm3 12mo              | 6,98         | 0,30        | 7,54         | 0,51        | 6,62         | 0,35        | 0,157        | 2,758 | 0,081 | 2,586 | 0,095 |
| Putamen cm3 24mo              | 7,20         | 0,28        | 7,75         | 0,53        | 6,84         | 0,29        | 0,157        |       |       |       |       |
| Putamen % BL                  | 0,50         | 0,02        | 0,52         | 0,04        | 0,49         | 0,03        | 0,384        |       |       |       |       |
| Putamen % 12mo                | 0,50         | 0,02        | 0,53         | 0,03        | 0,48         | 0,03        | 0,238        | 2,718 | 0,083 | 2,537 | 0,099 |
| Putamen % 24mo                | 0,52         | 0,02        | 0,54         | 0,03        | 0,50         | 0,03        | 0,343        |       |       |       |       |
| Thalamus cm3 BL               | 8,01         | 0,37        | 8,69         | 0,75        | 7,55         | 0,33        | 0,115        |       |       |       |       |
| Thalamus cm3 12mo             | 7,94         | 0,31        | 8,45         | 0,59        | 7,61         | 0,31        | 0,115        | 0,8   | 0,459 | 0,794 | 0,463 |
| <b>Thalamus cm3 24mo</b>      | <b>7,93</b>  | <b>0,36</b> | <b>8,74</b>  | <b>0,64</b> | <b>7,39</b>  | <b>0,35</b> | <b>0,069</b> |       |       |       |       |
| Thalamus % BL                 | 0,58         | 0,03        | 0,61         | 0,05        | 0,55         | 0,03        | 0,305        | 0,677 | 0,516 | 0,676 | 0,517 |

|                         |             |             |             |             |             |             |              |              |              |              |              |
|-------------------------|-------------|-------------|-------------|-------------|-------------|-------------|--------------|--------------|--------------|--------------|--------------|
| Thalamus % 12mo         | 0,57        | 0,02        | 0,60        | 0,04        | 0,56        | 0,03        | 0,343        |              |              |              |              |
| <b>Thalamus % 24mo</b>  | <b>0,57</b> | <b>0,02</b> | <b>0,61</b> | <b>0,04</b> | <b>0,54</b> | <b>0,03</b> | <b>0,098</b> |              |              |              |              |
| GlobusPallidus cm3 BL   | 1,91        | 0,15        | 1,94        | 0,28        | 1,89        | 0,19        | 1            |              |              |              |              |
| GlobusPallidus cm3 12mo | 1,86        | 0,11        | 1,79        | 0,23        | 1,90        | 0,10        | 0,384        | 2,849        | 0,075        | 2,665        | 0,089        |
| GlobusPallidus cm3 24mo | 1,91        | 0,11        | 1,93        | 0,18        | 1,89        | 0,14        | 1            |              |              |              |              |
| GlobusPallidus % BL     | 0,14        | 0,01        | 0,14        | 0,02        | 0,14        | 0,01        | 0,97         |              |              |              |              |
| GlobusPallidus % 12mo   | 0,13        | 0,01        | 0,13        | 0,01        | 0,14        | 0,01        | 0,238        | 2,979        | 0,067        | 2,802        | 0,079        |
| GlobusPallidus % 24mo   | 0,14        | 0,01        | 0,13        | 0,01        | 0,14        | 0,01        | 0,851        |              |              |              |              |
| Hippocampus cm3 BL      | 7,82        | 0,37        | 7,65        | 0,63        | 7,93        | 0,47        | 0,792        |              |              |              |              |
| Hippocampus cm3 12mo    | 7,75        | 0,27        | 7,72        | 0,56        | 7,76        | 0,27        | 0,97         | 2,147        | 0,136        | 2,036        | 0,151        |
| Hippocampus cm3 24mo    | 7,95        | 0,33        | 7,90        | 0,53        | 7,98        | 0,43        | 1            |              |              |              |              |
| Hippocampus % BL        | 0,56        | 0,03        | 0,54        | 0,05        | 0,58        | 0,03        | 0,851        |              |              |              |              |
| Hippocampus % 12mo      | 0,56        | 0,02        | 0,55        | 0,04        | 0,56        | 0,02        | 0,91         | 1,836        | 0,178        | 1,741        | 0,195        |
| Hippocampus % 24mo      | 0,57        | 0,02        | 0,56        | 0,04        | 0,58        | 0,03        | 0,624        |              |              |              |              |
| Amygdala cm3 BL         | 1,53        | 0,12        | 1,51        | 0,20        | 1,55        | 0,17        | 0,734        |              |              |              |              |
| Amygdala cm3 12mo       | 1,49        | 0,11        | 1,49        | 0,24        | 1,49        | 0,10        | 0,734        | <b>4,928</b> | <b>0,015</b> | <b>5,8</b>   | <b>0,008</b> |
| Amygdala cm3 24mo       | 1,53        | 0,13        | 1,76        | 0,24        | 1,38        | 0,12        | 0,208        |              |              |              |              |
| Amygdala % BL           | 0,11        | 0,01        | 0,11        | 0,01        | 0,11        | 0,01        | 0,91         |              |              |              |              |
| Amygdala % 12mo         | 0,11        | 0,01        | 0,11        | 0,02        | 0,11        | 0,01        | 0,624        | <b>5,42</b>  | <b>0,01</b>  | <b>6,099</b> | <b>0,007</b> |
| Amygdala % 24mo         | 0,11        | 0,01        | 0,12        | 0,02        | 0,10        | 0,01        | 0,343        |              |              |              |              |
| Accumbens cm3 BL        | 0,43        | 0,05        | 0,41        | 0,10        | 0,45        | 0,06        | 0,521        |              |              |              |              |
| Accumbens cm3 12mo      | 0,37        | 0,04        | 0,38        | 0,08        | 0,37        | 0,05        | 0,91         | 1,823        | 0,18         | 1,852        | 0,177        |
| Accumbens cm3 24mo      | 0,41        | 0,04        | 0,45        | 0,08        | 0,38        | 0,05        | 0,384        |              |              |              |              |
| Accumbens % BL          | 0,03        | 0,00        | 0,03        | 0,01        | 0,03        | 0,01        | 0,473        |              |              |              |              |
| Accumbens % 12mo        | 0,03        | 0,00        | 0,03        | 0,01        | 0,03        | 0,00        | 0,678        | 1,107        | 0,326        | 1,26         | 0,293        |
| Accumbens % 24mo        | 0,03        | 0,00        | 0,03        | 0,01        | 0,03        | 0,00        | 0,384        |              |              |              |              |
| ICV cm3 BL              | 1465,91     | 72,93       | 1436,48     | 42,17       | 1485,54     | 120,30      | 0,678        |              |              |              |              |
| ICV cm3 12mo            | 1394,97     | 28,94       | 1409,78     | 29,72       | 1385,09     | 44,88       | 0,91         | 0,483        | 0,501        | 0,431        | 0,526        |
| ICV cm3 24mo            | 1409,93     | 29,82       | 1415,89     | 25,51       | 1405,61     | 49,28       | 1            |              |              |              |              |
| LesionCount BL          | 20,25       | 2,86        | 18,13       | 4,65        | 21,67       | 3,73        | 0,624        |              |              |              |              |
| LesionCount 12mo        | 19,40       | 2,62        | 20,50       | 5,63        | 18,67       | 2,50        | 0,792        | 0,292        | 0,641        | 0,348        | 0,603        |
| LesionCount 24mo        | 20,60       | 2,67        | 20,75       | 5,72        | 20,50       | 2,58        | 0,521        |              |              |              |              |
| LesionVol cm3 BL        | 11,69       | 3,03        | 6,69        | 2,21        | 15,03       | 4,68        | 0,208        | 0,952        | 0,398        | 1,011        | 0,378        |

|                                 |       |      |       |      |       |      |       |       |       |       |       |
|---------------------------------|-------|------|-------|------|-------|------|-------|-------|-------|-------|-------|
| LesionVol cm3 12mo              | 9,60  | 2,71 | 9,29  | 4,67 | 9,81  | 3,44 | 0,624 |       |       |       |       |
| LesionVol cm3 24mo              | 10,34 | 2,72 | 10,27 | 4,73 | 10,38 | 3,44 | 0,624 |       |       |       |       |
| LesionVol (norm.) BL            | 0,71  | 0,15 | 0,46  | 0,16 | 0,86  | 0,22 | 0,268 |       |       |       |       |
| LesionVol (norm.) 12mo          | 0,66  | 0,18 | 0,64  | 0,31 | 0,67  | 0,23 | 0,571 | 1,646 | 0,211 | 1,703 | 0,202 |
| LesionVol (norm.) 24mo          | 0,67  | 0,19 | 0,71  | 0,32 | 0,64  | 0,24 | 1     |       |       |       |       |
| LesionBurden BL                 | 2,35  | 0,69 | 1,44  | 0,54 | 2,96  | 1,08 | 0,305 |       |       |       |       |
| LesionBurden 12mo               | 1,93  | 0,58 | 1,58  | 0,77 | 2,17  | 0,85 | 0,473 | 0,007 | 0,993 | 0,007 | 0,934 |
| LesionBurden 24mo               | 1,99  | 0,58 | 1,68  | 0,78 | 2,20  | 0,85 | 0,571 |       |       |       |       |
| PeriventrLesionCount BL         | 5,14  | 0,58 | 4,13  | 0,44 | 5,77  | 0,86 | 0,185 |       |       |       |       |
| PeriventrLesionCount 12mo       | 5,05  | 0,73 | 3,63  | 0,71 | 6,00  | 1,06 | 0,135 | 0,147 | 0,723 | 0,137 | 0,732 |
| PeriventrLesionCount 24mo       | 5,45  | 0,91 | 4,63  | 1,15 | 6,00  | 1,33 | 0,734 |       |       |       |       |
| PeriventrLesionVol cm3 BL       | 8,74  | 2,16 | 5,35  | 2,07 | 10,99 | 3,23 | 0,208 |       |       |       |       |
| PeriventrLesionVol cm3 12mo     | 8,49  | 2,55 | 7,87  | 4,13 | 8,91  | 3,40 | 0,571 | 0,965 | 0,353 | 0,953 | 0,357 |
| PeriventrLesionVol cm3 24mo     | 8,54  | 2,61 | 8,82  | 4,23 | 8,34  | 3,47 | 0,851 |       |       |       |       |
| PeriventrLesionVol (norm.) BL   | 0,55  | 0,13 | 0,38  | 0,15 | 0,67  | 0,18 | 0,27  |       |       |       |       |
| PeriventrLesionVol (norm.) 12mo | 0,58  | 0,17 | 0,55  | 0,28 | 0,61  | 0,23 | 0,521 | 1,302 | 0,279 | 1,256 | 0,088 |
| PeriventrLesionVol (norm.) 24mo | 0,59  | 0,18 | 0,62  | 0,29 | 0,58  | 0,23 | 0,91  |       |       |       |       |
| PeriventrLesionBurden BL        | 1,71  | 0,44 | 1,07  | 0,41 | 2,14  | 0,68 | 0,343 |       |       |       |       |
| PeriventrLesionBurden 12mo      | 1,71  | 0,56 | 1,33  | 0,68 | 1,97  | 0,83 | 0,473 | 0,075 | 0,827 | 0,068 | 0,835 |
| PeriventrLesionBurden 24mo      | 1,57  | 0,56 | 1,43  | 0,69 | 1,67  | 0,83 | 0,792 |       |       |       |       |
| JuxtacLesionCount BL            | 11,00 | 2,27 | 11,50 | 4,41 | 10,67 | 2,57 | 0,851 |       |       |       |       |
| JuxtacLesionCount 12mo          | 9,90  | 2,42 | 12,50 | 5,23 | 8,17  | 2,15 | 0,624 | 0,74  | 0,486 | 0,774 | 0,471 |
| JuxtacLesionCount 24mo          | 10,00 | 2,62 | 11,88 | 5,31 | 8,75  | 2,74 | 0,624 |       |       |       |       |
| JuxtacLesionVol cm3 BL          | 1,84  | 0,77 | 1,29  | 0,61 | 2,20  | 1,23 | 0,473 |       |       |       |       |
| JuxtacLesionVol cm3 12mo        | 0,98  | 0,28 | 1,29  | 0,61 | 0,77  | 0,24 | 0,571 | 0,376 | 0,557 | 0,418 | 0,535 |
| JuxtacLesionVol cm3 24mo        | 1,07  | 0,34 | 1,33  | 0,66 | 0,90  | 0,38 | 0,624 |       |       |       |       |
| JuxtacLesionVol (norm.) BL      | 0,12  | 0,05 | 0,09  | 0,04 | 0,15  | 0,08 | 0,851 |       |       |       |       |
| JuxtacLesionVol (norm.) 12mo    | 0,07  | 0,02 | 0,09  | 0,04 | 0,05  | 0,02 | 0,624 | 0,414 | 0,537 | 0,459 | 0,517 |
| JuxtacLesionVol (norm.) 24mo    | 0,07  | 0,02 | 0,09  | 0,04 | 0,06  | 0,03 | 0,521 |       |       |       |       |
| JuxtacLesionBurden BL           | 0,35  | 0,13 | 0,36  | 0,21 | 0,35  | 0,17 | 0,792 |       |       |       |       |
| JuxtacLesionBurden 12mo         | 0,19  | 0,05 | 0,23  | 0,10 | 0,17  | 0,06 | 0,91  | 0,066 | 0,811 | 0,058 | 0,823 |
| JuxtacLesionBurden 24mo         | 0,19  | 0,06 | 0,23  | 0,12 | 0,15  | 0,07 | 0,521 |       |       |       |       |
| DeepWhiteLesionCount BL         | 4,05  | 0,82 | 2,38  | 0,75 | 5,17  | 1,18 | 0,208 | 0,226 | 0,779 | 0,222 | 0,72  |

|                                         |               |             |               |             |               |             |              |              |              |              |              |
|-----------------------------------------|---------------|-------------|---------------|-------------|---------------|-------------|--------------|--------------|--------------|--------------|--------------|
| DeepWhiteLesionCount 12mo               | 4,45          | 0,55        | 4,38          | 0,73        | 4,50          | 0,81        | 1            |              |              |              |              |
| DeepWhiteLesionCount 24mo               | 4,10          | 0,70        | 4,25          | 0,80        | 4,00          | 1,06        | 0,473        |              |              |              |              |
| DeepWhiteLesionVol cm3 BL               | 1,12          | 1,03        | 0,05          | 0,01        | 1,83          | 1,71        | 0,27         |              |              |              |              |
| DeepWhiteLesionVol cm3 12mo             | 0,16          | 0,04        | 0,22          | 0,09        | 0,12          | 0,03        | 0,734        | 0,227        | 0,642        | 0,198        | 0,664        |
| DeepWhiteLesionVol cm3 24mo             | 0,10          | 0,03        | 0,12          | 0,05        | 0,08          | 0,04        | 0,427        |              |              |              |              |
| DeepWhiteLesionVol (norm.) BL           | 0,04          | 0,04        | 0,00          | 0,00        | 0,07          | 0,06        | 0,157        |              |              |              |              |
| DeepWhiteLesionVol (norm.) 12mo         | 0,01          | 0,00        | 0,01          | 0,01        | 0,01          | 0,00        | 0,773        | 0,198        | 0,664        | 0,183        | 0,677        |
| DeepWhiteLesionVol (norm.) 24mo         | 0,01          | 0,00        | 0,01          | 0,00        | 0,01          | 0,00        | 0,384        |              |              |              |              |
| DeepWhiteLesionBurden BL                | 0,29          | 0,28        | 0,01          | 0,00        | 0,48          | 0,46        | 0,181        |              |              |              |              |
| DeepWhiteLesionBurden 12mo              | 0,02          | 0,01        | 0,02          | 0,01        | 0,03          | 0,01        | 0,473        | 0,221        | 0,646        | 0,193        | 0,667        |
| DeepWhiteLesionBurden 24mo              | 0,02          | 0,01        | 0,02          | 0,01        | 0,01          | 0,01        | 0,427        |              |              |              |              |
| <b>CerebellumVol cm3 BL</b>             | <b>130,27</b> | <b>4,23</b> | <b>139,97</b> | <b>7,98</b> | <b>123,80</b> | <b>3,89</b> | <b>0,082</b> |              |              |              |              |
| <b>CerebellumVol cm3 12mo</b>           | <b>126,86</b> | <b>4,32</b> | <b>136,94</b> | <b>7,88</b> | <b>120,15</b> | <b>4,13</b> | <b>0,057</b> | <b>3,684</b> | <b>0,065</b> | <b>3,729</b> | <b>0,065</b> |
| CerebellumVol cm3 24mo                  | 124,91        | 4,64        | 129,69        | 10,34       | 121,73        | 3,79        | 0,208        |              |              |              |              |
| CerebellumVol % BL                      | 9,30          | 0,22        | 9,76          | 0,43        | 8,99          | 0,19        | 0,069        |              |              |              |              |
| <b>CerebellumVol % 12mo</b>             | <b>9,19</b>   | <b>0,21</b> | <b>9,68</b>   | <b>0,43</b> | <b>8,85</b>   | <b>0,16</b> | <b>0,02</b>  | <b>3,372</b> | <b>0,083</b> | <b>3,285</b> | <b>0,088</b> |
| CerebellumVol % 24mo                    | 8,99          | 0,29        | 9,22          | 0,69        | 8,84          | 0,18        | 0,115        |              |              |              |              |
| <b>CerebellumGMVol cm3 BL</b>           | <b>94,76</b>  | <b>4,15</b> | <b>105,46</b> | <b>8,33</b> | <b>87,64</b>  | <b>2,94</b> | <b>0,01</b>  |              |              |              |              |
| <b>CerebellumGMVol cm3 12mo</b>         | <b>91,03</b>  | <b>3,53</b> | <b>98,93</b>  | <b>5,94</b> | <b>85,77</b>  | <b>3,82</b> | <b>0,025</b> | <b>4,342</b> | <b>0,23</b>  | <b>5,082</b> | <b>0,014</b> |
| CerebellumGMVol cm3 24mo                | 90,02         | 3,64        | 92,66         | 7,42        | 88,26         | 3,75        | 0,305        |              |              |              |              |
| <b>CerebellumGMVol % BL</b>             | <b>6,76</b>   | <b>0,24</b> | <b>7,34</b>   | <b>0,49</b> | <b>6,36</b>   | <b>0,17</b> | <b>0,02</b>  |              |              |              |              |
| <b>CerebellumGMVol % 12mo</b>           | <b>6,54</b>   | <b>0,19</b> | <b>7,00</b>   | <b>0,34</b> | <b>6,23</b>   | <b>0,19</b> | <b>0,02</b>  | <b>4,279</b> | <b>0,024</b> | <b>4,862</b> | <b>0,016</b> |
| CerebellumGMVol % 24mo                  | 6,48          | 0,24        | 6,59          | 0,50        | 6,41          | 0,23        | 0,27         |              |              |              |              |
| CerebellumCorticalThikness cm3 BL       | 2,35          | 0,27        | 2,39          | 0,39        | 2,32          | 0,38        | 0,521        |              |              |              |              |
| CerebellumCorticalThikness cm3 12mo     | 2,23          | 0,28        | 1,91          | 0,16        | 2,45          | 0,45        | 0,792        | 0,831        | 0,446        | 0,878        | 0,428        |
| CerebellumCorticalThikness cm3 24mo     | 2,38          | 0,28        | 2,37          | 0,31        | 2,40          | 0,43        | 0,521        |              |              |              |              |
| CerebellumCorticalThikness (norm.) BL   | 2,09          | 0,24        | 2,11          | 0,34        | 2,08          | 0,35        | 0,473        |              |              |              |              |
| CerebellumCorticalThikness (norm.) 12mo | 2,00          | 0,25        | 1,70          | 0,14        | 2,20          | 0,41        | 0,851        | 0,833        | 0,445        | 0,879        | 0,394        |
| CerebellumCorticalThikness (norm.) 24mo | 2,14          | 0,25        | 2,11          | 0,27        | 2,15          | 0,39        | 0,473        |              |              |              |              |

SE: Standard Error of Mean; BL: Baseline; 12mo: 12 months; 24mo: 24 months; WM: White Matter; GM: Grey; Matter; CSF: Cerebro-spinal fluid; IC: Intra-cerebral; LatVentricles: Lateral ventricles; ICV: Intra-cerebral volume; LesionVol: Lesion volume; norm: normalized; \*Mann-Whitney U test for responders vs. non-responders; bold indicates measurements with p<0.01.

**Table S2.** % mean reduction in cerebellar volume and in Grey Matter cerebellar volume from baseline at 12 – and at 24 months for responders at 24 months versus non-responders at 24 months

| Parameter                            | Non-responders (N=8)        |       | Responders (N=12)           |       | p*    |
|--------------------------------------|-----------------------------|-------|-----------------------------|-------|-------|
|                                      | % Mean change from baseline | SE    | % Mean change from baseline | SE    |       |
| Cerebrum GM cm <sup>3</sup> 12mo     | 18.54                       | 9.49  | 20.95                       | 31.55 | 0.663 |
| Cerebrum GM cm <sup>3</sup> 24mo     | -4.38                       | 25.17 | 7.08                        | 25.47 | 0.58  |
| Cerebrum GM % 12mo                   | 1.68                        | 0.68  | 1.86                        | 2.17  | 0.399 |
| Cerebrum GM % 24mo                   | -0.1                        | 1.73  | 0.92                        | 1.73  | 0.294 |
| CerebellumVol cm <sup>3</sup> 12mo   | -2,14                       | 1,47  | -2,91                       | 1,49  | 0.46  |
| CerebellumVol cm <sup>3</sup> 24mo   | -6,38                       | 6,63  | -1,58                       | 1,16  | 0.788 |
| CerebellumVol % 12mo                 | -0,75                       | 1,59  | -1,35                       | 0,98  | 0.718 |
| CerebellumVol % 24mo                 | -4,98                       | 6,66  | -1,47                       | 1,55  | 0.713 |
| CerebellumGMVol cm <sup>3</sup> 12mo | -4,93                       | 3,44  | -2,27                       | 2,38  | 0.931 |
| CerebellumGMVol cm <sup>3</sup> 24mo | -10,35                      | 6,52  | 0,82                        | 2,94  | 0.681 |
| CerebellumGMVol % 12mo               | -3,70                       | 3,16  | -1,82                       | 2,48  | 0.748 |
| CerebellumGMVol % 24mo               | -9,10                       | 6,41  | 0,98                        | 3,18  | 0.442 |
| LesionCount 12mo                     | 2.38                        | 2.58  | -3                          | 3.28  | 0.872 |
| LesionCount 24mo                     | 2.63                        | 2.99  | -1.17                       | 3.7   | 0.754 |
| LesionVol cm <sup>3</sup> 12mo       | 2.6                         | 3.88  | -5.22                       | 3.8   | 0.4   |
| LesionVol cm <sup>3</sup> 24mo       | 3.58                        | 3.71  | -4.65                       | 3.78  | 0.426 |
| LesionVol (norm.) 12mo               | 0.18                        | 0.27  | -0.22                       | 0.18  | 0.48  |
| LesionVol (norm.) 24mo               | 0.25                        | 0.26  | -0.25                       | 0.21  | 0.579 |
| LesionBurden 12mo                    | 0.14                        | 0.33  | -0.72                       | 1.03  | 0.365 |
| LesionBurden 24mo                    | 0.24                        | 0.32  | -0.76                       | 1.03  | 0.383 |

SE: Standard Error of Mean; BL: Baseline; 12mo: 12 months; 24mo: 24 months; GM: Grey; Matter; \* Repeated Measures - General Linear Model mean comparison between responders and non-responders.



**Table S3.** Association of volumetry and lesion analysis parameters' variability with cognitive and EDSS scores' variability over time (only associations with p values <0.1 are presented).

| Dependent variable | Fixed factor (in addition to time) | -2 Restricted Log Likelihood | Estimate      | p            |
|--------------------|------------------------------------|------------------------------|---------------|--------------|
| <b>SDMT</b>        | <b>LatVentricles_abs</b>           | <b>364.219</b>               | <b>-0.34</b>  | <b>0.015</b> |
|                    | <b>LatVentricles_percent</b>       | <b>358.689</b>               | <b>-4.97</b>  | <b>0.012</b> |
|                    | Hippocampus_abs                    | 364.554                      | -0.86         | 0.093        |
|                    | Hippocampus_percent                | 358.921                      | -13.17        | 0.078        |
|                    | <b>Amygdala_percent</b>            | <b>356.453</b>               | <b>-39.33</b> | <b>0.047</b> |
|                    | <b>ICV_abs</b>                     | <b>369.751</b>               | <b>0.008</b>  | <b>0.018</b> |
|                    | <b>LesionCount</b>                 | <b>362.004</b>               | <b>0.26</b>   | <b>0.001</b> |
|                    | <b>PeriventrLesionCount</b>        | <b>371.799</b>               | <b>0.57</b>   | <b>0.004</b> |
|                    | JuxtacLesionCount                  | 369.433                      | 0.19          | 0.05         |
|                    | <b>DeepWhiteLesionVol_abs</b>      | <b>367.436</b>               | <b>0.41</b>   | <b>0.035</b> |
|                    | <b>DeepWhiteLesionVol_norm</b>     | <b>356.802</b>               | <b>11.09</b>  | <b>0.042</b> |
|                    | <b>DeepWhiteLesionBurden</b>       | <b>364.667</b>               | <b>1.57</b>   | <b>0.033</b> |
|                    | CerebellumVol_abs                  | 368.819                      | 0.08          | 0.068        |
|                    | <b>CerebellumGMVol_abs</b>         | <b>365.829</b>               | <b>0.12</b>   | <b>0.012</b> |
|                    | <b>CerebellumGMVol_percent</b>     | <b>361.441</b>               | <b>1.75</b>   | <b>0.022</b> |
| <b>GVLT</b>        | <b>LatVentricles_abs</b>           | <b>416.139</b>               | <b>-0.47</b>  | <b>0.012</b> |
|                    | <b>LatVentricles_percent</b>       | <b>411.061</b>               | <b>-6.71</b>  | <b>0.012</b> |
|                    | <b>Thalamus_abs</b>                | <b>415.626</b>               | <b>1.99</b>   | <b>0.047</b> |
|                    | <b>Thalamus_percent</b>            | <b>409.107</b>               | <b>30.34</b>  | <b>0.03</b>  |
|                    | DeepWhiteLesionVol_abs             | 420.862                      | 0.74          | 0.052        |
|                    | DeepWhiteLesionVol_norm            | 408.786                      | 20.27         | 0.057        |
|                    | <b>DeepWhiteLesionBurden</b>       | <b>418.092</b>               | <b>2.84</b>   | <b>0.049</b> |
|                    | CerebellumCorticalThikness_abs     | 414.720                      | -2.4          | 0.059        |
|                    | CerebellumCorticalThikness_norm    | 414.448                      | -2.73         | 0.057        |
| <b>BVLT-R</b>      | <b>LatVentricles_abs</b>           | <b>394.187</b>               | <b>-0.35</b>  | <b>0.02</b>  |
|                    | <b>LatVentricles_percent</b>       | <b>387.626</b>               | <b>-5.57</b>  | <b>0.009</b> |

|             |                                |                |               |                  |
|-------------|--------------------------------|----------------|---------------|------------------|
| <b>MFIS</b> | <b>Putamen_abs</b>             | <b>391.533</b> | <b>1.94</b>   | <b>0.027</b>     |
|             | Putamen_percent                | 387.9          | 20.88         | 0.094            |
|             | <b>Thalamus_abs</b>            | <b>391.356</b> | <b>1.86</b>   | <b>0.026</b>     |
|             | WM_abs                         | 481.15         | 0.04          | 0.092            |
|             | <b>IC_abs</b>                  | <b>479.579</b> | <b>0.05</b>   | <b>0.045</b>     |
|             | <b>LatVentricles_abs</b>       | <b>468.472</b> | <b>0.97</b>   | <b>&lt;0.001</b> |
|             | <b>LatVentricles_percent</b>   | <b>464.94</b>  | <b>3.9</b>    | <b>0.002</b>     |
|             | <b>Thalamus_percent</b>        | <b>465.154</b> | <b>-50.71</b> | <b>0.018</b>     |
|             | <b>JuxtacLesionVol_abs</b>     | <b>467.674</b> | <b>1.57</b>   | <b>0.034</b>     |
|             | <b>JuxtacLesionVol_norm</b>    | <b>462.549</b> | <b>22.42</b>  | <b>0.04</b>      |
|             | <b>JuxtacLesionBurden</b>      | <b>464.342</b> | <b>10.58</b>  | <b>0.031</b>     |
|             | <b>CerebellumVol_percent</b>   | <b>468.597</b> | <b>-5.66</b>  | <b>0.008</b>     |
|             | CerebellumGMVol_abs            | 477.778        | -0.23         | 0.098            |
|             | <b>CerebellumGMVol_percent</b> | <b>468.794</b> | <b>-5.52</b>  | <b>0.013</b>     |
| <b>EDSS</b> | CSF_percent                    | 147.898        | -0.03         | 0.068            |
|             | Brain_abs                      | 152.772        | 0.002         | 0.059            |
|             | Brain_percent                  | 147.898        | -0.03         | 0.068            |
|             | Cerebrum_abs                   | 152.540        | 0.002         | 0.053            |
|             | Cerebrum_percent               | 147.585        | 0.03          | 0.059            |
|             | Cerebelum_WM_abs               | 148.089        | 0.02          | 0.051            |
|             | Cerebelum_WM_percent           | 143.482        | 0.24          | 0.08             |

SDMT, Symbol Digit Modalities Test; GVLTL, Greek Verbal Learning Test; BVMT-R, Brief Visuospatial Memory Test-Revised; MFIS, Modified Fatigue Impact Scale; EDSS: Expanded Disability Status Scale. Bold indicates significant associations between volumetry and/or lesion analysis parameters' variability with cognitive and/or EDSS scores' variability over time.

**Table S4.** Immune cell phenotype assessed at baseline pre-1<sup>st</sup> infusion (BLa) and 15 days after treatment with the 1<sup>st</sup> infusion and pre-2<sup>nd</sup> infusion (BLb), as well as in 6-month intervals thereafter, prior to the next scheduled infusion of ocrelizumab and % change from baseline for 6-month interval point estimates for all patients and non-responders at 24 months versus responders at 24 months.

| Cell subset    | absolute cell counts or % |         |        |                |         |        |            |         |        |       | % mean change from BLa |        |      |                |        |       |            |        |      |       |
|----------------|---------------------------|---------|--------|----------------|---------|--------|------------|---------|--------|-------|------------------------|--------|------|----------------|--------|-------|------------|--------|------|-------|
|                | All patients              |         |        | Non-responders |         |        | Responders |         |        | p*    | All patients           |        |      | Non-responders |        |       | Responders |        |      | p*    |
|                | N                         | Mean    | SE     | N              | Mean    | SE     | N          | Mean    | SE     |       | N                      | Mean   | SE   | N              | Mean   | SE    | N          | Mean   | SE   |       |
| #WBCs BLa      | 21                        | 7,48    | 0,32   | 9              | 7,11    | 0,46   | 12         | 7,75    | 0,43   | 0,247 |                        |        |      |                |        |       |            |        |      |       |
| #WBCs BLb      | 21                        | 7,35    | 0,47   | 9              | 7,33    | 0,58   | 12         | 7,36    | 0,73   | 0,917 | 21                     | -1,89  | 4,37 | 9              | 3,79   | 5,56  | 12         | -6,15  | 6,34 | 0,193 |
| #WBCs 6mo      | 21                        | 6,73    | 0,38   | 9              | 6,59    | 0,79   | 12         | 6,83    | 0,34   | 0,651 | 21                     | -9,40  | 4,25 | 9              | -8,69  | 7,33  | 12         | -9,93  | 5,29 | 1     |
| #WBCs 12mo     | 21                        | 7,76    | 0,65   | 9              | 6,91    | 0,54   | 12         | 8,39    | 1,04   | 0,193 | 21                     | 3,59   | 6,35 | 9              | -1,33  | 8,11  | 12         | 7,28   | 9,47 | 0,554 |
| #WBCs 18mo     | 19                        | 7,16    | 0,55   | 8              | 7,59    | 1,17   | 11         | 6,85    | 0,48   | 0,968 | 19                     | -1,76  | 6,50 | 8              | 7,44   | 13,34 | 11         | -8,45  | 5,47 | 0,6   |
| #WBCs 24mo     | 16                        | 7,83    | 0,83   | 6              | 8,60    | 1,91   | 10         | 7,36    | 0,75   | 0,875 | 16                     | 0,93   | 7,49 | 6              | 8,08   | 17,82 | 10         | -3,36  | 6,18 | 0,958 |
| #lymp/tes BLa  | 22                        | 1894,55 | 84,97  | 9              | 1647,78 | 110,25 | 13         | 2065,38 | 99,12  | 0,011 |                        |        |      |                |        |       |            |        |      |       |
| #lymp/tes BLb  | 21                        | 1510,48 | 72,80  | 8              | 1410,00 | 63,78  | 13         | 1572,31 | 109,41 | 0,336 | 21                     | -20,42 | 3,34 | 8              | -16,91 | 3,54  | 13         | -22,58 | 4,96 | 0,301 |
| #lymp/tes 6mo  | 22                        | 1463,64 | 83,91  | 9              | 1316,67 | 129,91 | 13         | 1565,38 | 104,65 | 0,071 | 22                     | -20,58 | 4,54 | 9              | -17,75 | 8,30  | 13         | -22,55 | 5,34 | 0,794 |
| #lymp/tes 12mo | 21                        | 1653,81 | 140,60 | 8              | 1495,00 | 152,68 | 13         | 1751,54 | 206,79 | 0,547 | 21                     | -13,52 | 4,53 | 8              | -10,02 | 4,84  | 13         | -15,67 | 6,76 | 0,456 |
| #lymp/tes 18mo | 19                        | 1587,37 | 102,79 | 8              | 1601,25 | 170,59 | 11         | 1577,27 | 134,19 | 0,968 | 19                     | -12,64 | 6,28 | 8              | -1,26  | 10,55 | 11         | -20,91 | 7,06 | 0,177 |
| #lymp/tes 24mo | 16                        | 1487,50 | 91,05  | 6              | 1571,67 | 144,44 | 10         | 1437,00 | 119,98 | 0,428 | 16                     | -16,93 | 6,62 | 6              | 2,46   | 10,24 | 10         | -28,57 | 6,46 | 0,031 |
| #CD19 BLa      | 22                        | 102,37  | 9,22   | 9              | 100,21  | 15,47  | 13         | 103,87  | 11,87  | 0,647 |                        |        |      |                |        |       |            |        |      |       |
| #CD19 BLb      | 21                        | 0,60    | 0,09   | 8              | 0,66    | 0,16   | 13         | 0,56    | 0,12   | 0,595 | 21                     | -99,23 | 0,20 | 8              | -98,94 | 0,49  | 13         | -99,40 | 0,13 | 0,697 |
| #CD19 6mo      | 22                        | 8,63    | 3,13   | 9              | 8,54    | 5,15   | 13         | 8,70    | 4,09   | 0,948 | 22                     | -92,88 | 1,80 | 9              | -92,84 | 2,78  | 13         | -92,90 | 2,46 | 0,896 |
| #CD19 12mo     | 21                        | 4,00    | 1,40   | 8              | 5,68    | 2,69   | 13         | 2,97    | 1,57   | 0,301 | 21                     | -96,07 | 1,20 | 8              | -94,88 | 2,14  | 13         | -96,80 | 1,45 | 0,336 |
| #CD19 18mo     | 19                        | 1,81    | 0,69   | 8              | 2,39    | 1,48   | 11         | 1,40    | 0,58   | 0,968 | 16                     | -91,58 | 3,04 | 6              | -85,66 | 6,75  | 10         | -95,14 | 2,37 | 0,428 |
| #CD19 24mo     | 16                        | 8,42    | 4,26   | 6              | 15,64   | 10,96  | 10         | 4,10    | 1,67   | 0,635 | 16                     | -91,58 | 3,04 | 6              | -85,66 | 6,75  | 10         | -95,14 | 2,37 | 0,428 |
| %CD19 BLa      | 22                        | 9,84    | 0,89   | 9              | 9,63    | 1,49   | 13         | 9,99    | 1,14   | 0,647 |                        |        |      |                |        |       |            |        |      |       |
| %CD19 BLb      | 21                        | 0,06    | 0,01   | 8              | 0,06    | 0,01   | 13         | 0,05    | 0,01   | 0,645 | 21                     | -99,23 | 0,20 | 8              | -98,97 | 0,47  | 13         | -99,39 | 0,14 | 0,75  |
| %CD19 6mo      | 22                        | 0,83    | 0,30   | 9              | 0,82    | 0,49   | 13         | 0,84    | 0,39   | 1     | 22                     | -92,89 | 1,80 | 9              | -92,87 | 2,77  | 13         | -92,91 | 2,47 | 0,794 |
| %CD19 12mo     | 22                        | 0,39    | 0,13   | 9              | 0,49    | 0,23   | 13         | 0,33    | 0,15   | 0,695 | 22                     | -95,97 | 1,13 | 9              | -95,39 | 1,95  | 13         | -96,38 | 1,40 | 0,647 |
| %CD19 18mo     | 21                        | 0,33    | 0,22   | 9              | 0,08    | 0,03   | 12         | 0,52    | 0,38   | 0,31  | 21                     | -97,13 | 1,33 | 9              | -98,81 | 0,48  | 12         | -95,86 | 2,27 | 0,345 |
| %CD19 24mo     | 16                        | 0,59    | 0,31   | 6              | 1,08    | 0,79   | 10         | 0,29    | 0,12   | 0,635 | 16                     | -94,36 | 2,00 | 6              | -90,40 | 4,62  | 10         | -96,73 | 1,35 | 0,492 |
| %pl/blasts BLa | 22                        | 1,43    | 0,31   | 9              | 1,61    | 0,60   | 13         | 1,30    | 0,34   | 0,794 |                        |        |      |                |        |       |            |        |      |       |

|                 |    |       |      |   |              |              |           |              |             |              |    |         |         |   |               |               |    |                |                |              |
|-----------------|----|-------|------|---|--------------|--------------|-----------|--------------|-------------|--------------|----|---------|---------|---|---------------|---------------|----|----------------|----------------|--------------|
| %pl/blasts BLb  | 21 | 19,14 | 6,31 | 8 | 23,06        | 11,40        | 13        | 16,73        | 7,70        | 0,804        | 18 | 1428,39 | 619,06  | 7 | 1586,93       | 1144,15       | 11 | 1327,50        | 750,75         | 0,93         |
| %pl/blasts 6mo  | 22 | 13,82 | 4,15 | 9 | <b>22,66</b> | <b>7,19</b>  | <b>13</b> | <b>7,70</b>  | <b>4,40</b> | <b>0,043</b> | 19 | 1419,01 | 607,94  | 8 | 2755,10       | 1294,52       | 11 | 447,32         | 267,80         | 0,109        |
| %pl/blasts 12mo | 21 | 25,62 | 6,04 | 8 | <b>39,54</b> | <b>10,62</b> | <b>13</b> | <b>17,05</b> | <b>6,46</b> | <b>0,076</b> | 18 | 2218,15 | 967,75  | 7 | 3760,24       | 2300,94       | 11 | 1236,81        | 579,80         | 0,246        |
| %pl/blasts18mo  | 20 | 21,56 | 5,02 | 8 | 18,57        | 8,45         | 12        | 23,56        | 6,43        | 0,624        | 17 | 1505,01 | 655,39  | 7 | 394,37        | 303,91        | 10 | 2282,45        | 1044,97        | 0,193        |
| %pl/blasts 24mo | 16 | 22,28 | 6,97 | 6 | 9,98         | 4,23         | 10        | 29,66        | 10,37       | 0,368        | 13 | 2871,89 | 1843,25 | 5 | 333,96        | 132,83        | 8  | 4458,10        | 2919,56        | 0,171        |
| %tr. CD19+ BLa  | 19 | 2,33  | 1,32 | 9 | 1,47         | 0,80         | 10        | 3,11         | 2,45        | 1            |    |         |         |   |               |               |    |                |                |              |
| %tr. CD19+ BLb  | 18 | 0,00  | 0,00 | 8 | 0,00         | 0,00         | 10        | 0,00         | 0,00        | 1            | 11 | -100,00 | 0,00    | 5 | -100,00       | 0,00          | 6  | -100,00        | 0,00           | 1            |
| %tr. CD19+ 6mo  | 19 | 14,65 | 4,06 | 9 | 9,82         | 5,32         | 10        | 19,01        | 5,95        | 0,278        | 12 | 1781,30 | 863,03  | 6 | <b>349,25</b> | <b>205,99</b> | 6  | <b>3213,35</b> | <b>1553,87</b> | <b>0,026</b> |
| %tr. CD19+12mo  | 18 | 7,22  | 3,04 | 8 | 6,28         | 3,94         | 10        | 7,96         | 4,64        | 0,897        | 12 | 986,26  | 537,54  | 6 | 389,71        | 351,84        | 6  | 1582,81        | 1002,60        | 0,485        |
| %tr. CD19+ 18mo | 17 | 6,57  | 4,05 | 8 | 0,00         | 0,00         | 9         | 12,40        | 7,28        | 0,139        | 12 | 307,53  | 386,10  | 6 | -100,00       | 0,00          | 6  | 715,05         | 767,78         | 0,394        |
| %tr. CD19+ 24mo | 13 | 15,87 | 6,50 | 6 | 11,95        | 8,00         | 7         | 19,22        | 10,34       | 0,731        | 11 | 3010,12 | 1644,57 | 5 | 2945,92       | 2953,12       | 6  | 3063,62        | 2025,26        | 0,792        |
| %MZ BLa         | 22 | 16,45 | 2,68 | 9 | 14,02        | 2,97         | 13        | 18,12        | 4,08        | 0,948        |    |         |         |   |               |               |    |                |                |              |
| %MZ BLb         | 21 | 0,00  | 0,00 | 8 | 0,00         | 0,00         | 13        | 0,00         | 0,00        | 1            | 20 | -100,00 | 0,00    | 7 | -100,00       | 0,00          | 13 | -100,00        | 0,00           | 1            |
| %MZ 6mo         | 22 | 1,09  | 0,46 | 9 | 1,29         | 0,77         | 13        | 0,95         | 0,60        | 0,744        | 21 | -90,53  | 4,76    | 8 | -91,08        | 6,74          | 13 | -90,19         | 6,68           | 0,972        |
| %MZ 12mo        | 21 | 0,53  | 0,30 | 8 | 0,90         | 0,61         | 13        | 0,31         | 0,31        | 0,547        | 20 | -90,62  | 7,60    | 7 | -76,27        | 21,43         | 13 | -98,34         | 1,66           | 0,485        |
| %MZ 18mo        | 20 | 0,98  | 0,81 | 8 | 0,00         | 0,00         | 12        | 1,63         | 1,34        | 0,384        | 19 | -94,18  | 4,60    | 7 | -100,00       | 0,00          | 12 | -90,78         | 7,22           | 0,384        |
| %MZ 24mo        | 16 | 0,41  | 0,28 | 6 | 0,59         | 0,59         | 10        | 0,29         | 0,29        | 0,792        | 15 | -90,48  | 8,20    | 5 | -75,45        | 24,55         | 10 | -97,99         | 2,01           | 0,768        |
| %cl. sw.BLa     | 22 | 12,58 | 1,47 | 9 | 12,03        | 2,01         | 13        | 12,96        | 2,12        | 0,948        |    |         |         |   |               |               |    |                |                |              |
| %cl. sw.BLb     | 21 | 2,50  | 1,77 | 8 | 4,07         | 4,07         | 13        | 1,53         | 1,53        | 0,86         | 20 | -86,11  | 10,06   | 7 | -73,99        | 26,01         | 13 | -92,64         | 7,36           | 0,817        |
| %cl. sw.6mo     | 22 | 10,65 | 2,62 | 9 | 12,28        | 4,63         | 13        | 9,52         | 3,19        | 0,744        | 21 | -26,35  | 18,63   | 8 | -19,61        | 29,66         | 13 | -30,49         | 24,79          | 0,697        |
| %cl. sw.12mo    | 21 | 9,64  | 3,40 | 8 | 8,44         | 5,66         | 13        | 10,37        | 4,42        | 0,972        | 18 | -7,44   | 1,41    | 8 | -5,57         | 2,09          | 10 | -8,94          | 1,86           | 0,408        |
| %cl. sw.18mo    | 20 | 8,79  | 3,16 | 8 | 7,27         | 4,98         | 12        | 9,81         | 4,24        | 0,624        | 19 | -48,96  | 18,39   | 7 | -46,80        | 34,62         | 12 | -50,22         | 22,24          | 0,837        |
| %cl. sw.24mo    | 16 | 6,63  | 2,08 | 6 | 8,51         | 3,81         | 10        | 5,50         | 2,51        | 0,562        | 15 | -57,63  | 13,05   | 5 | -28,98        | 23,65         | 10 | -71,95         | 14,30          | 0,165        |
| %non-sw. BLa    | 19 | 1,00  | 0,15 | 9 | 0,82         | 0,19         | 10        | 1,16         | 0,24        | 0,604        |    |         |         |   |               |               |    |                |                |              |
| %non-sw. BLb    | 19 | 0,00  | 0,00 | 9 | 0,00         | 0,00         | 10        | 0,00         | 0,00        | 1            | 18 | -100,00 | 0,00    | 8 | -100,00       | 0,00          | 10 | -100,00        | 0,00           | 1            |
| %non-sw. 6mo    | 19 | 0,00  | 0,00 | 9 | 0,00         | 0,00         | 10        | 0,00         | 0,00        | 1            | 18 | -100,00 | 0,00    | 8 | -100,00       | 0,00          | 10 | -100,00        | 0,00           | 1            |
| %non-sw. 12mo   | 19 | 0,11  | 0,11 | 9 | 0,24         | 0,24         | 10        | 0,00         | 0,00        | 0,72         | 18 | -89,19  | 10,81   | 8 | -75,68        | 24,32         | 10 | -100,00        | 0,00           | 0,696        |
| %non-sw. 18mo   | 16 | 1,05  | 1,05 | 8 | 0,00         | 0,00         | 8         | 2,11         | 2,11        | 0,721        | 15 | 72,82   | 172,82  | 7 | -100,00       | 0,00          | 8  | 224,04         | 324,04         | 0,694        |
| %non-sw. 24mo   | 13 | 0,30  | 0,23 | 6 | 0,65         | 0,48         | 7         | 0,00         | 0,00        | 0,366        | 12 | -53,84  | 34,61   | 5 | 10,79         | 78,21         | 7  | -100,00        | 0,00           | 0,268        |
| %naive B BLa    | 22 | 58,64 | 4,24 | 9 | 54,91        | 7,65         | 13        | 61,22        | 4,98        | 0,601        |    |         |         |   |               |               |    |                |                |              |
| %naive B BLb    | 22 | 0,00  | 0,00 | 9 | 0,00         | 0,00         | 13        | 0,00         | 0,00        | 1            | 21 | -100,00 | 0,00    | 8 | -100,00       | 0,00          | 13 | -100,00        | 0,00           | 1            |

|                |    |         |        |          |               |              |           |               |              |              |    |        |       |   |        |       |    |        |       |       |
|----------------|----|---------|--------|----------|---------------|--------------|-----------|---------------|--------------|--------------|----|--------|-------|---|--------|-------|----|--------|-------|-------|
| %naive B 6mo   | 22 | 36,70   | 7,43   | 9        | 31,52         | 11,68        | 13        | 40,28         | 9,90         | 0,744        | 21 | -43,21 | 12,09 | 8 | -57,75 | 18,17 | 13 | -34,26 | 16,04 | 0,374 |
| %naive B 12mo  | 21 | 16,66   | 5,70   | 8        | 19,51         | 10,05        | 13        | 14,91         | 7,12         | 0,75         | 20 | -72,59 | 10,49 | 7 | -72,95 | 17,79 | 13 | -72,40 | 13,51 | 0,938 |
| %naive B 18mo  | 20 | 16,10   | 6,95   | 8        | 8,17          | 8,17         | 12        | 21,40         | 10,22        | 0,305        | 19 | -72,37 | 11,53 | 7 | -82,20 | 17,80 | 12 | -66,63 | 15,34 | 0,432 |
| %naive B 24mo  | 16 | 28,27   | 7,95   | 6        | 39,79         | 14,14        | 10        | 21,36         | 9,37         | 0,313        | 15 | -47,98 | 14,61 | 5 | -27,39 | 21,70 | 10 | -58,28 | 18,92 | 0,44  |
| #CD3+ BLa      | 22 | 754,71  | 15,70  | <b>9</b> | <b>713,81</b> | <b>15,10</b> | <b>13</b> | <b>783,03</b> | <b>21,48</b> | <b>0,043</b> |    |        |       |   |        |       |    |        |       |       |
| #CD3+ BLb      | 19 | 825,90  | 15,76  | <b>7</b> | <b>768,74</b> | <b>12,78</b> | <b>12</b> | <b>859,25</b> | <b>17,81</b> | <b>0,004</b> | 19 | 8,59   | 2,11  | 7 | 5,82   | 2,20  | 12 | 10,21  | 3,06  | 0,482 |
| #CD3+ 6mo      | 21 | 816,20  | 20,80  | <b>9</b> | <b>741,45</b> | <b>26,36</b> | <b>12</b> | <b>872,26</b> | <b>18,21</b> | <b>0,001</b> | 21 | 7,75   | 2,26  | 9 | 4,12   | 3,84  | 12 | 10,47  | 2,58  | 0,169 |
| #CD3+ 12mo     | 15 | 813,69  | 30,07  | 7        | 772,72        | 45,86        | 8         | 849,55        | 37,68        | 0,281        | 15 | 7,58   | 3,03  | 7 | 9,66   | 5,46  | 8  | 5,75   | 3,33  | 0,397 |
| #CD3+ 18mo     | 15 | 810,33  | 25,73  | <b>5</b> | <b>717,88</b> | <b>45,14</b> | <b>10</b> | <b>856,56</b> | <b>19,48</b> | <b>0,008</b> | 15 | 5,59   | 2,38  | 5 | 3,45   | 6,04  | 10 | 6,67   | 2,17  | 0,371 |
| #CD3+ 24mo     | 13 | 1113,85 | 94,32  | 5        | 1029,86       | 101,19       | 8         | 1166,34       | 141,77       | 0,622        | 13 | 46,28  | 10,78 | 5 | 49,38  | 15,74 | 8  | 44,35  | 15,28 | 1     |
| #Neutr/ls BLa  | 22 | 4618,18 | 283,20 | 9        | 4644,44       | 463,41       | 13        | 4600,00       | 371,93       | 0,896        |    |        |       |   |        |       |    |        |       |       |
| #Neutr/ls BLb  | 19 | 4831,58 | 434,48 | 7        | 4657,14       | 405,24       | 12        | 4933,33       | 659,01       | 0,837        | 19 | 5,47   | 5,40  | 7 | 6,29   | 8,13  | 12 | 4,99   | 7,38  | 0,902 |
| #Neutr/ls mo   | 21 | 4671,43 | 512,61 | 9        | 5111,11       | 1164,69      | 12        | 4341,67       | 270,37       | 0,754        | 21 | 2,53   | 7,89  | 9 | 5,34   | 17,25 | 12 | 0,42   | 5,89  | 0,554 |
| #Neutr/ls 12mo | 19 | 5242,11 | 542,70 | 9        | 4611,11       | 423,43       | 10        | 5810,00       | 948,74       | 0,604        | 19 | 12,98  | 9,81  | 9 | 5,98   | 14,42 | 10 | 19,28  | 13,78 | 0,4   |
| #Neutr/ls 18mo | 17 | 4217,65 | 297,44 | 5        | 3900,00       | 727,32       | 12        | 4350,00       | 311,03       | 0,383        | 17 | -3,33  | 7,62  | 5 | -11,62 | 22,54 | 12 | 0,12   | 6,24  | 0,279 |
| #Neutr/ls 24mo | 13 | 5130,77 | 571,37 | 5        | 4720,00       | 513,23       | 8         | 5387,50       | 889,31       | 0,833        | 13 | 5,72   | 6,26  | 5 | -3,06  | 6,68  | 8  | 11,21  | 9,06  | 0,435 |

#: absolute cell counts; WBCs: white blood cells (K/ $\mu$ l) ;lymp/tes: lymphocytes/ $\mu$ l; CD19: CD19+ cells/ $\mu$ l; pl/blasts: plasmablasts (% of CD19+ cells); tr. CD19: transitional B-cells (% of CD19+ cells); MZ: Marginal zone-like B-cells (% of CD19+ cells); cl.sw.: class-switched B-cells (% of CD19+ cells); non-sw.: non-switched B-cells (% of CD19+ cells); naive B: naive B-cells (% of CD19+ cells); CD3: CD3+ cells/ $\mu$ l; Neutr/ls: neutrophils (cells/ $\mu$ l); BLa: baseline pre-1st infusion; BLb: 15 days after treatment with the 1st infusion and pre-2nd infusion; SE: Standard Error of Mean; 6mo: 6 months; 12mo: 12 months; 18mo: 18 months; 24mo: 24 months; \*Mann-Whitney U test for non-responders at 24 months versus responders at 24 months; bold indicates measurements with  $p < 0.01$ .

**Table S5.** Cytokine levels assessed at baseline pre-1<sup>st</sup> infusion (BL), as well as in 6- and 12-month time-points, prior to the next scheduled infusion of ocrelizumab and % mean cytokine change from baseline for 6- and 12-month time-points for all patients and non-responders at 24 months versus responders at 24 months.

| Cytokine          | pg/ml        |        |       |                |        |        |            |        |       |       | % mean change from BL |        |       |                |         |        |            |        |       |       |
|-------------------|--------------|--------|-------|----------------|--------|--------|------------|--------|-------|-------|-----------------------|--------|-------|----------------|---------|--------|------------|--------|-------|-------|
|                   | All patients |        |       | Non-responders |        |        | Responders |        |       | p     | All patients          |        |       | Non-responders |         |        | Responders |        |       | p     |
|                   | N            | Mean   | SE    | N              | Mean   | SE     | N          | Mean   | SE    |       | N                     | Mean   | SE    | N              | Mean    | SE     | N          | Mean   | SE    |       |
| IL-4 BL           | 17           | 52,18  | 4,29  | 7              | 54,86  | 6,93   | 10         | 50,30  | 5,68  | 0,813 |                       |        |       |                |         |        |            |        |       |       |
| IL-5 BL           | 17           | 148,06 | 18,35 | 7              | 180,86 | 33,18  | 10         | 125,10 | 19,03 | 0,23  |                       |        |       |                |         |        |            |        |       |       |
| IL-17A BL         | 17           | 114,53 | 11,92 | 7              | 131,29 | 17,44  | 10         | 102,80 | 15,83 | 0,23  |                       |        |       |                |         |        |            |        |       |       |
| IFN $\gamma$ BL   | 17           | 175,47 | 18,19 | 7              | 201,00 | 34,87  | 10         | 157,60 | 18,62 | 0,601 |                       |        |       |                |         |        |            |        |       |       |
| IL-10 BL          | 17           | 64,35  | 8,71  | 7              | 58,29  | 6,48   | 10         | 68,60  | 14,32 | 0,962 |                       |        |       |                |         |        |            |        |       |       |
| IL-12 BL          | 17           | 1,76   | 0,55  | 7              | 2,29   | 1,29   | 10         | 1,40   | 0,31  | 1     |                       |        |       |                |         |        |            |        |       |       |
| IL-1b BL          | 17           | 37,41  | 3,94  | 7              | 38,14  | 3,45   | 10         | 36,90  | 6,43  | 0,669 |                       |        |       |                |         |        |            |        |       |       |
| IL-2 BL           | 17           | 51,12  | 3,96  | 7              | 54,57  | 5,74   | 10         | 48,70  | 5,52  | 0,475 |                       |        |       |                |         |        |            |        |       |       |
| IL-6 BL           | 17           | 109,59 | 11,85 | 7              | 132,86 | 18,16  | 10         | 93,30  | 14,10 | 0,161 |                       |        |       |                |         |        |            |        |       |       |
| TNF $\alpha$ BL   | 17           | 81,12  | 7,95  | 7              | 89,86  | 14,51  | 10         | 75,00  | 9,10  | 0,536 |                       |        |       |                |         |        |            |        |       |       |
| IL-4 6mo          | 20           | 46,10  | 4,15  | 9              | 47,78  | 6,05   | 11         | 44,73  | 5,91  | 0,603 | 17                    | 8,99   | 9,19  | 7              | 17,29   | 13,37  | 10         | 3,18   | 12,76 | 0,475 |
| IL-5 6mo          | 20           | 136,90 | 17,15 | 9              | 149,78 | 24,32  | 11         | 126,36 | 24,58 | 0,552 | 17                    | -8,59  | 19,43 | 7              | 17,08   | 17,68  | 10         | -26,56 | 30,14 | 0,475 |
| IL-17A 6mo        | 20           | 105,15 | 11,01 | 9              | 117,44 | 17,22  | 11         | 95,09  | 14,21 | 0,331 | 17                    | -6,60  | 19,94 | 7              | 15,91   | 14,13  | 10         | -22,36 | 32,27 | 0,417 |
| IFN $\gamma$ 6mo  | 20           | 259,55 | 98,92 | 9              | 401,56 | 215,67 | 11         | 143,36 | 18,99 | 0,152 | 17                    | -46,35 | 51,48 | 7              | -117,19 | 124,65 | 10         | 3,23   | 9,76  | 0,74  |
| IL-10 6mo         | 20           | 54,30  | 4,51  | 9              | 58,67  | 6,37   | 11         | 50,73  | 6,39  | 0,295 | 17                    | 7,12   | 8,13  | 7              | 0,45    | 14,60  | 10         | 11,79  | 9,72  | 0,475 |
| IL-12 6mo         | 20           | 1,25   | 0,25  | 9              | 1,56   | 0,56   | 11         | 1,00   | 0,00  | 0,71  | 17                    | 9,71   | 5,46  | 7              | 5,71    | 5,71   | 10         | 12,50  | 8,54  | 0,813 |
| IL-1b 6mo         | 20           | 31,20  | 3,48  | 9              | 34,78  | 4,84   | 11         | 28,27  | 4,95  | 0,23  | 17                    | 10,58  | 11,11 | 7              | 16,15   | 16,50  | 10         | 6,69   | 15,56 | 0,813 |
| IL-2 6mo          | 20           | 47,45  | 3,58  | 9              | 53,11  | 5,11   | 11         | 42,82  | 4,75  | 0,152 | 17                    | 3,37   | 7,19  | 7              | 3,07    | 12,24  | 10         | 3,58   | 9,29  | 0,813 |
| IL-6 6mo          | 20           | 105,20 | 11,47 | 9              | 112,56 | 18,09  | 11         | 99,18  | 15,22 | 0,656 | 17                    | -31,35 | 38,76 | 7              | 20,24   | 12,58  | 10         | -67,47 | 64,14 | 0,23  |
| TNF $\alpha$ 6mo  | 20           | 73,15  | 8,53  | 9              | 78,44  | 11,24  | 11         | 68,82  | 12,83 | 0,456 | 17                    | 12,73  | 6,69  | 7              | 19,66   | 8,34   | 10         | 7,87   | 9,82  | 0,475 |
| IL-4 12mo         | 20           | 46,30  | 3,47  | 9              | 45,22  | 5,49   | 11         | 47,18  | 4,66  | 0,941 | 17                    | 1,87   | 15,99 | 7              | 22,49   | 12,67  | 10         | -12,56 | 25,33 | 0,315 |
| IL-5 12mo         | 20           | 146,15 | 15,01 | 9              | 142,56 | 26,65  | 11         | 149,09 | 17,64 | 0,882 | 17                    | -35,96 | 42,79 | 7              | 25,75   | 15,74  | 10         | -79,16 | 70,10 | 0,109 |
| IL-7A 12mo        | 20           | 108,70 | 10,36 | 9              | 110,00 | 11,24  | 11         | 107,64 | 16,97 | 0,941 | 17                    | -35,32 | 39,01 | 7              | 6,52    | 25,53  | 10         | -64,60 | 63,75 | 0,417 |
| IFN $\gamma$ 12mo | 20           | 162,15 | 12,01 | 9              | 161,78 | 19,36  | 11         | 162,45 | 15,89 | 0,941 | 17                    | -2,13  | 15,93 | 7              | 20,49   | 12,45  | 10         | -17,97 | 25,03 | 0,315 |
| IL-10 12mo        | 20           | 54,35  | 4,19  | 9              | 53,22  | 6,50   | 11         | 55,27  | 5,72  | 0,941 | 17                    | 6,97   | 11,91 | 7              | 16,19   | 10,72  | 10         | 0,52   | 19,07 | 0,669 |

|                   |    |        |      |   |       |       |    |        |       |       |    |        |       |          |              |              |           |                |               |              |
|-------------------|----|--------|------|---|-------|-------|----|--------|-------|-------|----|--------|-------|----------|--------------|--------------|-----------|----------------|---------------|--------------|
| <b>IL-12 12mo</b> | 20 | 1,05   | 0,05 | 9 | 1,00  | 0,00  | 11 | 1,09   | 0,09  | 0,766 | 17 | 12,65  | 7,05  | 7        | 12,86        | 12,86        | 10        | 12,50          | 8,54          | 1            |
| <b>IL-1b 12mo</b> | 20 | 33,65  | 3,79 | 9 | 31,33 | 5,47  | 11 | 35,55  | 5,40  | 0,656 | 17 | -5,28  | 22,45 | 7        | 26,64        | 13,73        | 10        | -27,61         | 36,07         | 0,475        |
| <b>IL-2 12mo</b>  | 20 | 48,75  | 2,89 | 9 | 47,00 | 3,70  | 11 | 50,18  | 4,41  | 0,552 | 17 | -0,87  | 11,76 | 7        | 15,68        | 9,52         | 10        | -12,45         | 18,43         | 0,315        |
| <b>IL-6 12mo</b>  | 20 | 100,40 | 8,87 | 9 | 96,78 | 12,11 | 11 | 103,36 | 13,17 | 0,503 | 17 | -63,97 | 80,46 | <b>7</b> | <b>31,41</b> | <b>10,08</b> | <b>10</b> | <b>-130,74</b> | <b>135,33</b> | <b>0,055</b> |
| <b>TNFα 12mo</b>  | 20 | 78,65  | 6,62 | 9 | 78,89 | 10,73 | 11 | 78,45  | 8,73  | 0,941 | 17 | -11,03 | 23,05 | 7        | 18,56        | 11,52        | 10        | -31,74         | 37,79         | 0,364        |

SE: Standard Error of Mean; BL: Baseline; 6mo: 6 months; 12mo: 12 months; IL: interleukin; IFNγ: interferon-γ; TNFα: Tumor Necrosis Factor-α; \*Mann-Whitney U test for non-responders at 24 months versus responders at 24 months; bold indicates measurements with p<0.01.
